# Supplementary material for: Targeted Isolation of Antibiofilm Compounds from Halophytic Endophyte Bacillus velezensis 7NPB-3B Using LC-HR-MS-Based Metabolomics
Source: MDPI journal article supplement (doi:10.3390/microorganisms12020413), 2024-02-19

# Targeted Isolation of Antibiofilm Compounds from Halophytic Endophyte *Bacillus velezensis* 7NPB-3B using LC-HR-MS based Metabolomics

Sanju Singh<sup>1,2,3</sup>, Elizabeth Nwagwu<sup>3</sup>, Louise Young<sup>3</sup>, Pankaj Kumar<sup>1,2</sup>, Pramod B. Shinde<sup>1,2,\*</sup>,  
RuAngelie Edrada-Ebel<sup>3,\*</sup>

<sup>1</sup>Natural Products & Green Chemistry Division, CSIR-Central Salt and Marine Chemicals Research Institute (CSIR-CSMCRI), Council of Scientific and Industrial Research (CSIR), Bhavnagar-364002, Gujarat, India

<sup>2</sup>Academy of Scientific and Innovative Research (AcSIR), Ghaziabad-201002, India

<sup>3</sup>Strathclyde Institute of Pharmacy and Biomedical Sciences, University of Strathclyde, The John Arbuthnott Building, 161 Cathedral Street, Glasgow G4 0RE, UK

\* Correspondence: pramodshinde@csmcri.res.in (P.B.S.); ruangelie.edrada-ebel@strath.ac.uk (R.E.E)

**Table S1.** <sup>1</sup>H- and <sup>13</sup>C-NMR data of isolated compounds **2-5** (DMSO-*d*<sub>6</sub>, 400Hz)

| Sr. no. | 2                                                                       | 3                                         | 4                                                              | 3                                             |
|---------|-------------------------------------------------------------------------|-------------------------------------------|----------------------------------------------------------------|-----------------------------------------------|
|         | <sup>1</sup> H NMR δ <sub>H</sub> (ppm, multi. <i>J</i> in Hz)          | <sup>13</sup> C NMR, δ <sub>H</sub> (ppm) | <sup>1</sup> H NMR δ <sub>H</sub> (ppm, multi. <i>J</i> in Hz) | <sup>13</sup> C NMR                           |
|         | <b>Leucine</b>                                                          | <b>Valine</b>                             | <b>Leucine</b>                                                 | <b>Proline</b>                                |
| 1       |                                                                         | -                                         | -                                                              | -                                             |
| 2       | 3.66 ( <i>dt</i> , <i>J</i> = 9.5, 4.8 Hz, 1H)                          | 55.75 (CH)                                | 3.62 ( <i>ddd</i> , <i>J</i> = 4.0, 2.7, 1.1 Hz, 1H)           | 59.96 (CH)                                    |
| 3       | δ 8.32 ( <i>dd</i> , <i>J</i> = 7.5, 4.2 Hz, 1H)                        | -(NH)                                     | 8.04 ( <i>d</i> , <i>J</i> = 2.5 Hz, 1H)                       | -(NH)                                         |
| 4       | 1.54 ( <i>td</i> , <i>J</i> = 8.0, 3.1 Hz, 1H)<br>1.81 ( <i>m</i> , 1H) | 45.21 (CH <sub>2</sub> )                  | 2.15 – 2.05 ( <i>m</i> , 1H)                                   | 31.97 (CH)                                    |
| 5       | 1.81 ( <i>m</i> , 1H)                                                   | 24.37 (CH)                                | 0.95 ( <i>d</i> , <i>J</i> = 7.0 Hz, 3H)                       | 19.14 (CH <sub>3</sub> )                      |
| 6       | 0.87 ( <i>d</i> , <i>J</i> = 6.2 Hz, 3H)                                | 22.09 (CH <sub>3</sub> )                  | 0.86 ( <i>d</i> , <i>J</i> = 4.6 Hz, 3H)                       | 17.79 (CH <sub>3</sub> )                      |
| 7       | 0.90 ( <i>d</i> , <i>J</i> = 6.6 Hz, 3H)                                | 22.43 (CH <sub>3</sub> )                  |                                                                | 0.87 ( <i>dd</i> , <i>J</i> = 6.71, 2.07, 3H) |
|         | <b>Phenylalanine</b>                                                    | <b>Phenylalanine</b>                      | <b>Valine</b>                                                  | <b>Phenylalanine</b>                          |
| 1'      | -                                                                       | 167.88 (C)                                | -                                                              | 167.15 (C)                                    |
| 2'      | 3.84 ( <i>dt</i> , <i>J</i> = 9.7, 5.1 Hz, 1H)                          | 58.87 (CH)                                | 4.35 ( <i>t</i> , <i>J</i> = 4.9 Hz, 1H)                       | 56.00 (CH)                                    |
| 3'      | 8.03 ( <i>d</i> , <i>J</i> = 4.6 Hz, 1H)                                | -(NH)                                     | 8.04 ( <i>d</i> , <i>J</i> = 2.5 Hz, 1H)                       | -(NH)                                         |
| 4'      | 3.12 ( <i>dd</i> , <i>J</i> = 10.2, 7.5 Hz, 2H)                         | 41.79 (CH <sub>2</sub> )                  | 3.13 – 2.99 ( <i>m</i> , 1H)                                   | 35.85 (CH <sub>2</sub> )                      |
| 5'      | -                                                                       | 138.44 (C)                                | -                                                              | 136.28                                        |
| 6'      | 7.26 – 7.23 ( <i>m</i> , 5H)                                            | 128.78 (CH)                               | 7.36 – 7.10 ( <i>m</i> , 5H)                                   | 128.38 (CH)                                   |
| 7'      |                                                                         | 126.75 (CH)                               |                                                                | 126.77 (CH)                                   |
| 8'      |                                                                         | 130.27 (CH)                               |                                                                | 130.16 (CH)                                   |
| 9'      |                                                                         | 126.75 (CH)                               |                                                                | 126.77 (CH)                                   |
| 10'     |                                                                         | 128.78 (CH)                               |                                                                | 128.38 (CH)                                   |

Figure S1: Structures of the discriminating dereplicated metabolites detected from the OPLS-DA plot of sub-fractions listed in table 3.

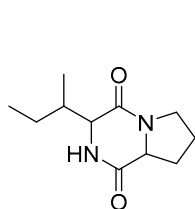

Cyclo (isoleucyl-prolyl)

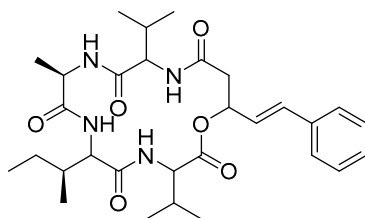

Turnagainolide A

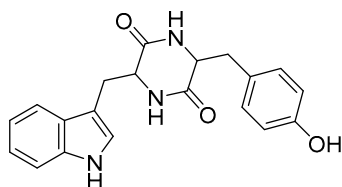

Cyclo (tryptophanyl-tyrosyl)

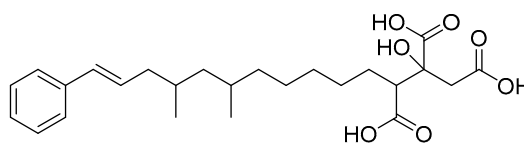

Antibiotic L 731128

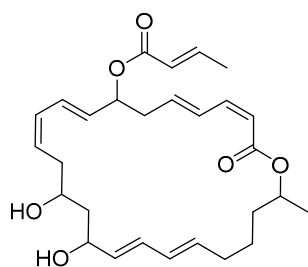

7-O-(2E-butenoyl) Macrolactin A

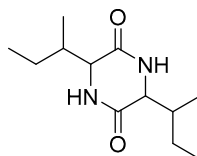

Cyclo (isoleucyl-isoleucyl)

Figure S2A: 2D correlations (COSY and HMBC) of compounds **2-5**.

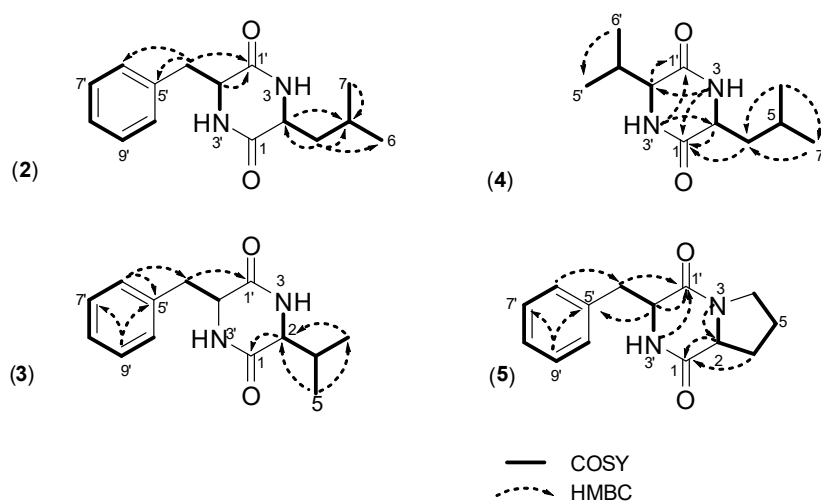

Figure S2B: ECD data of compounds **2-5** in methanol.

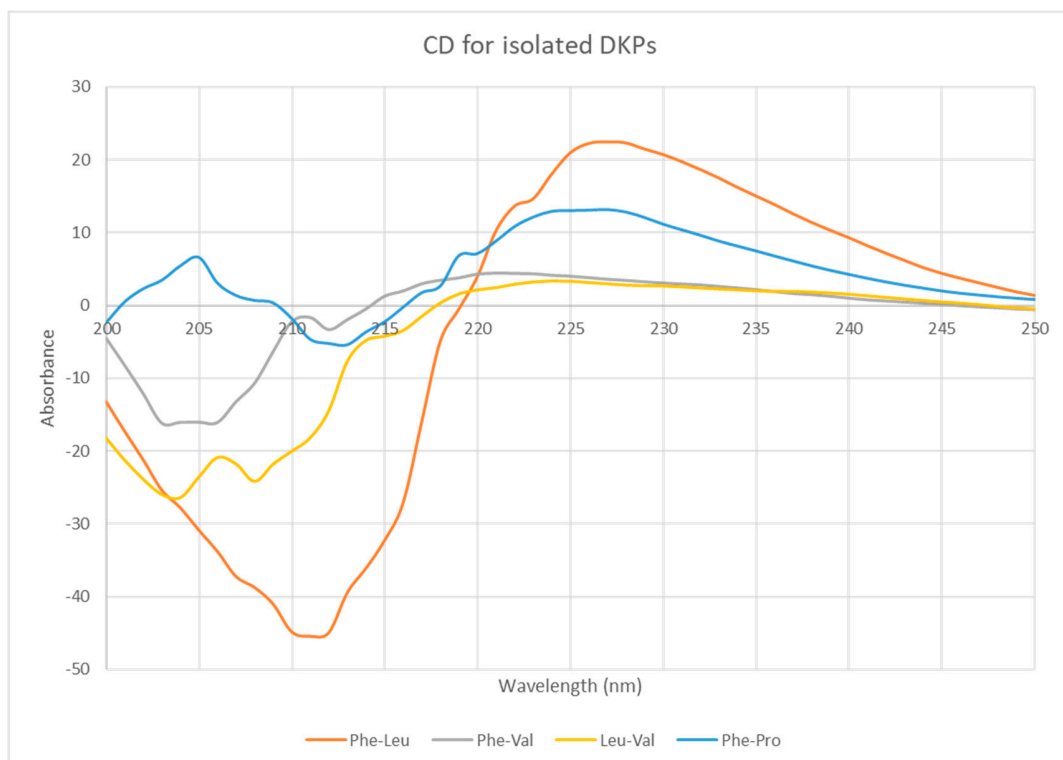

Figure S3:  $^1\text{H}$  NMR spectrum of **1**

D364515.1.fid — Person npb22125 — F-15.4.1 — @proton DMSO {C:\NMRdata} AIG 104

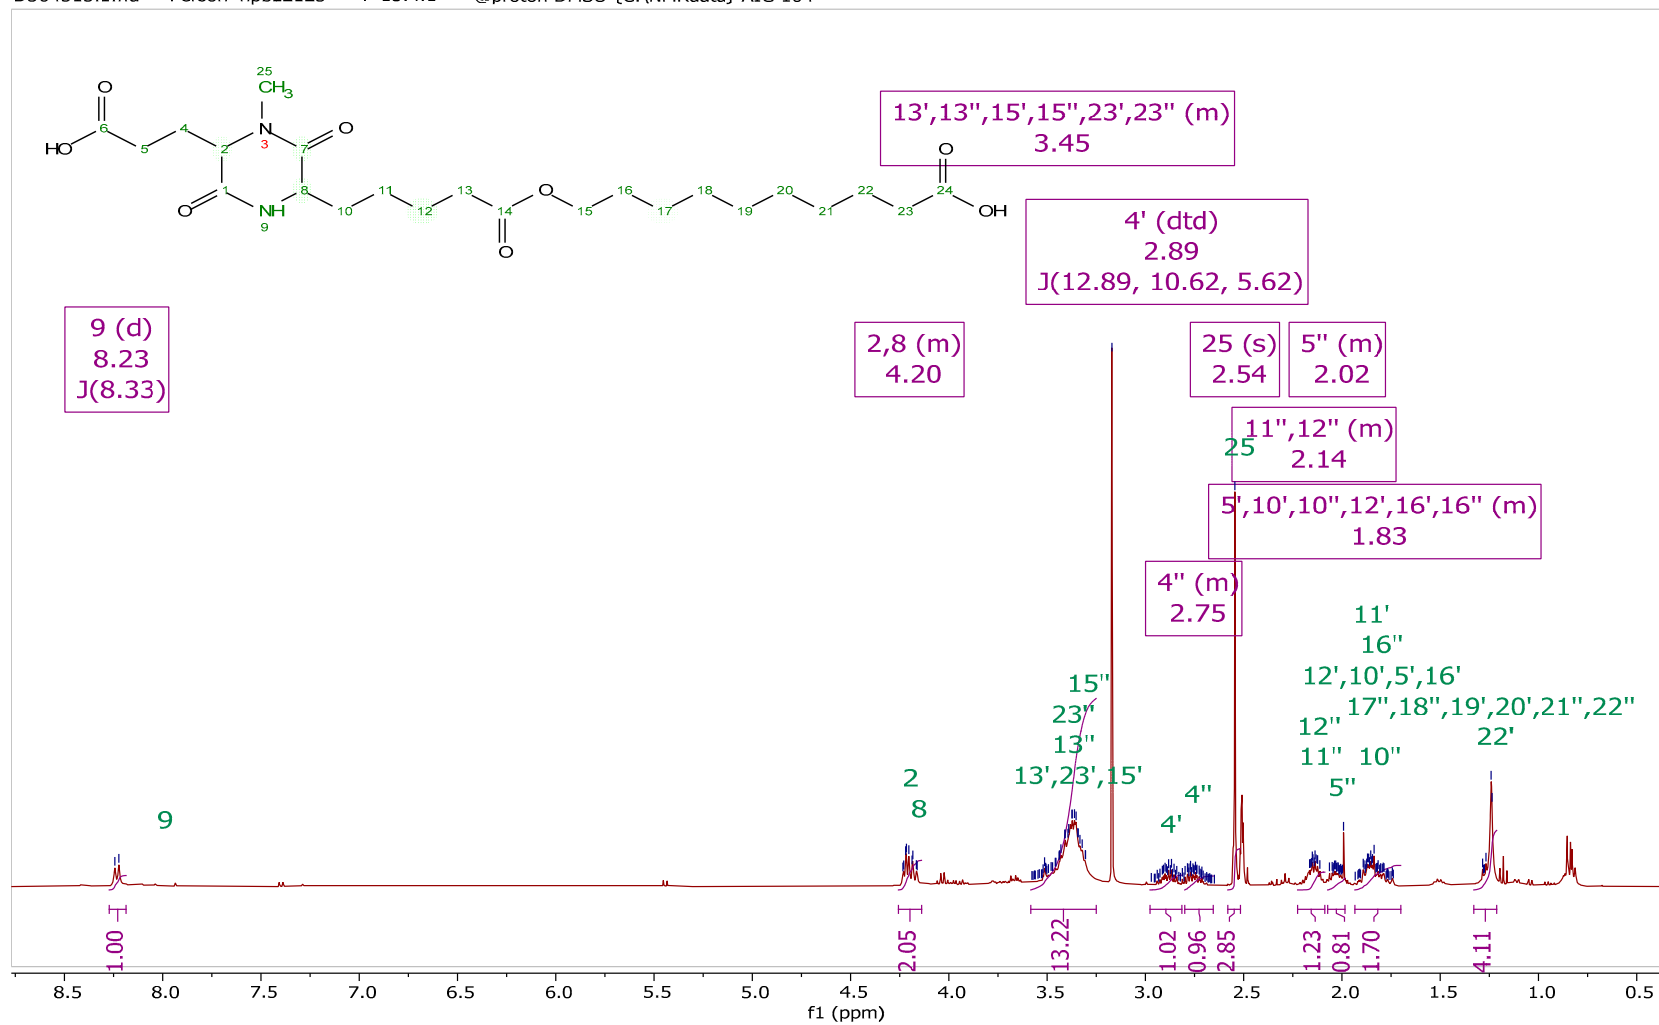

Figure S4: J Mod  $^{13}\text{C}$  NMR spectrum of **1**

D364515.6.fid — Person npb22125 — F-15.4.1 — @DEPTQ dimethylsulfoxide-d6 {C:\NMRdata} AIG 104

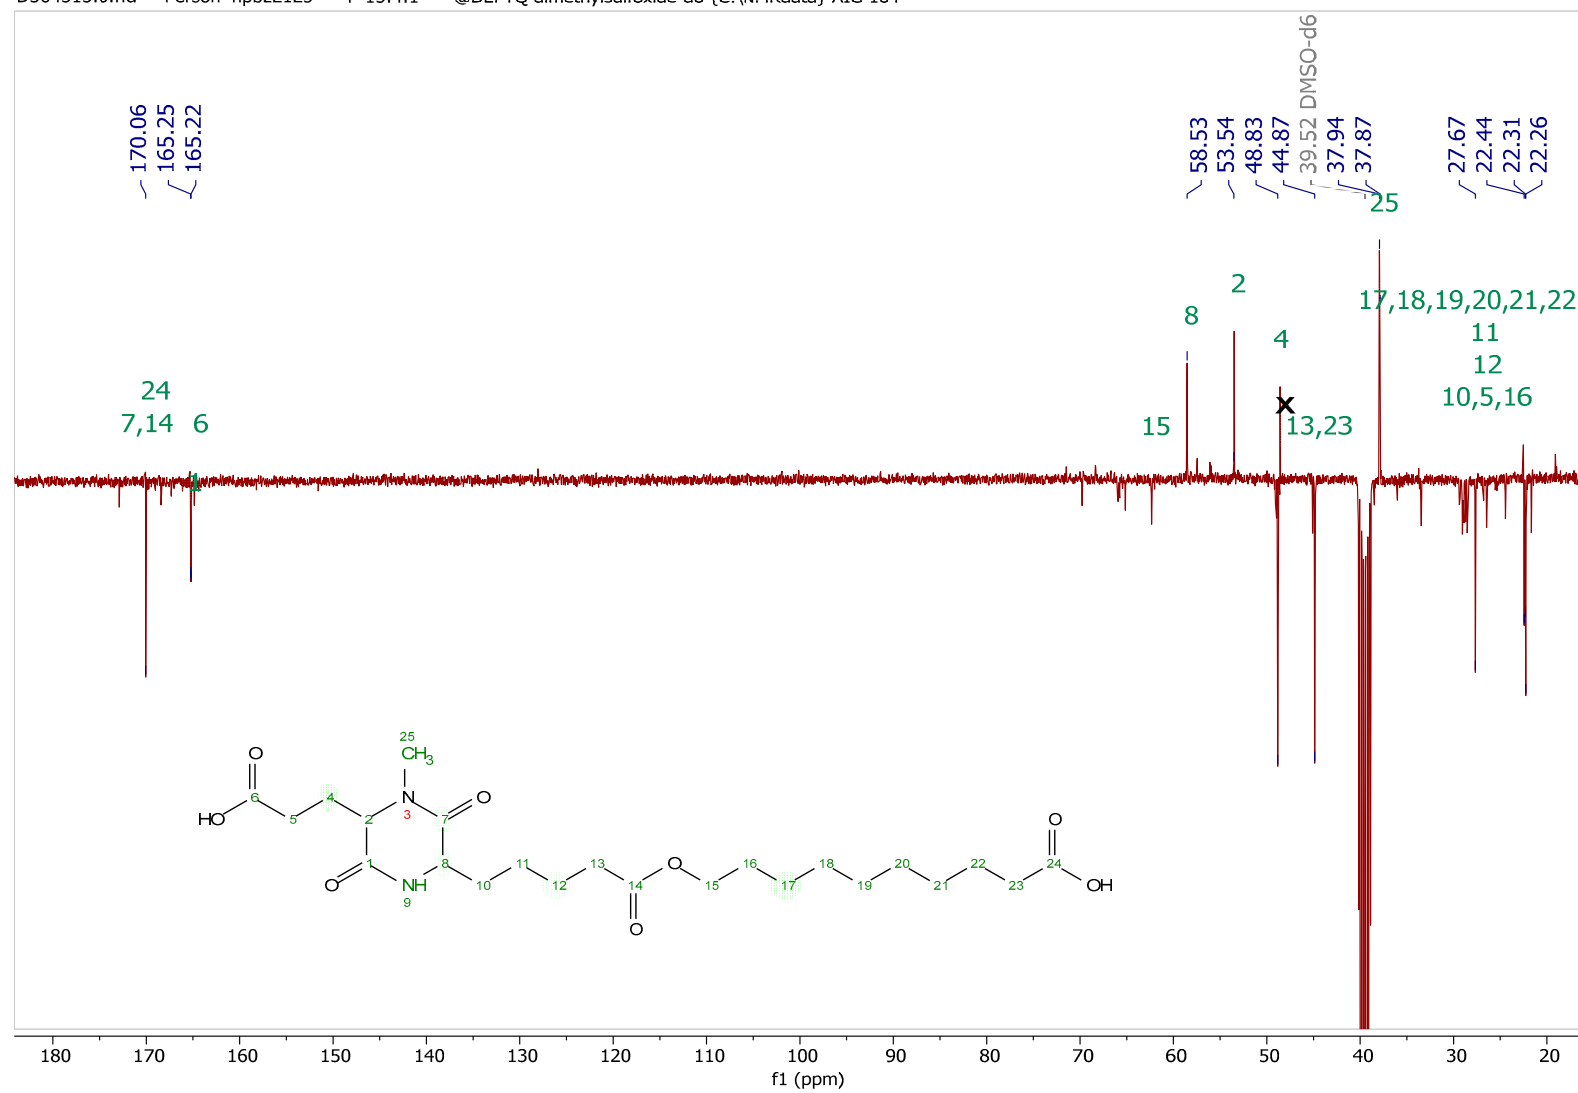

D364515.4.ser — Person npb22125 — F-15.4.1 — @HMBC DMSO {C:\NMRdata} AIG 104

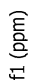

Figure S6: COSY spectrum of **1**

D364515.2.ser — Person npb22125 — F-15.4.1 — @COSY\_cryo DMSO {C:\NMRdata} AIG 104

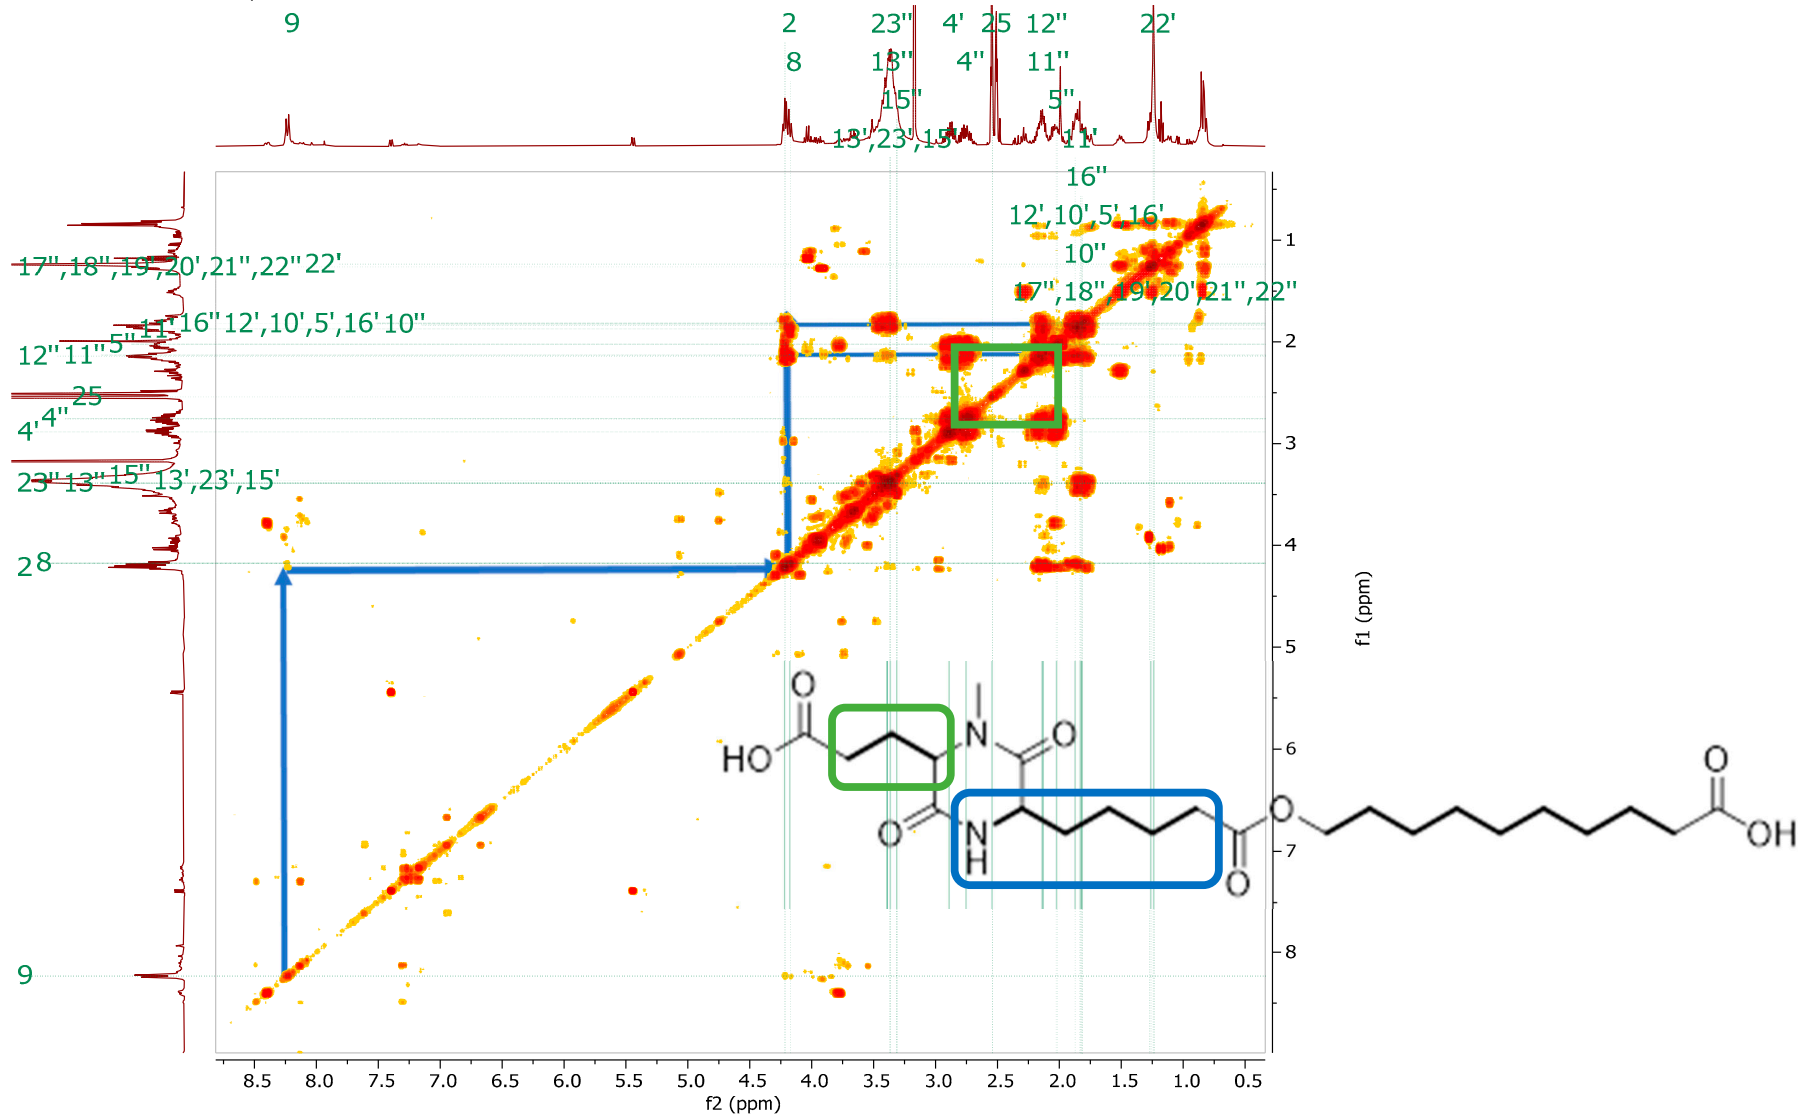



Figure S7: HSQC spectrum of **1**

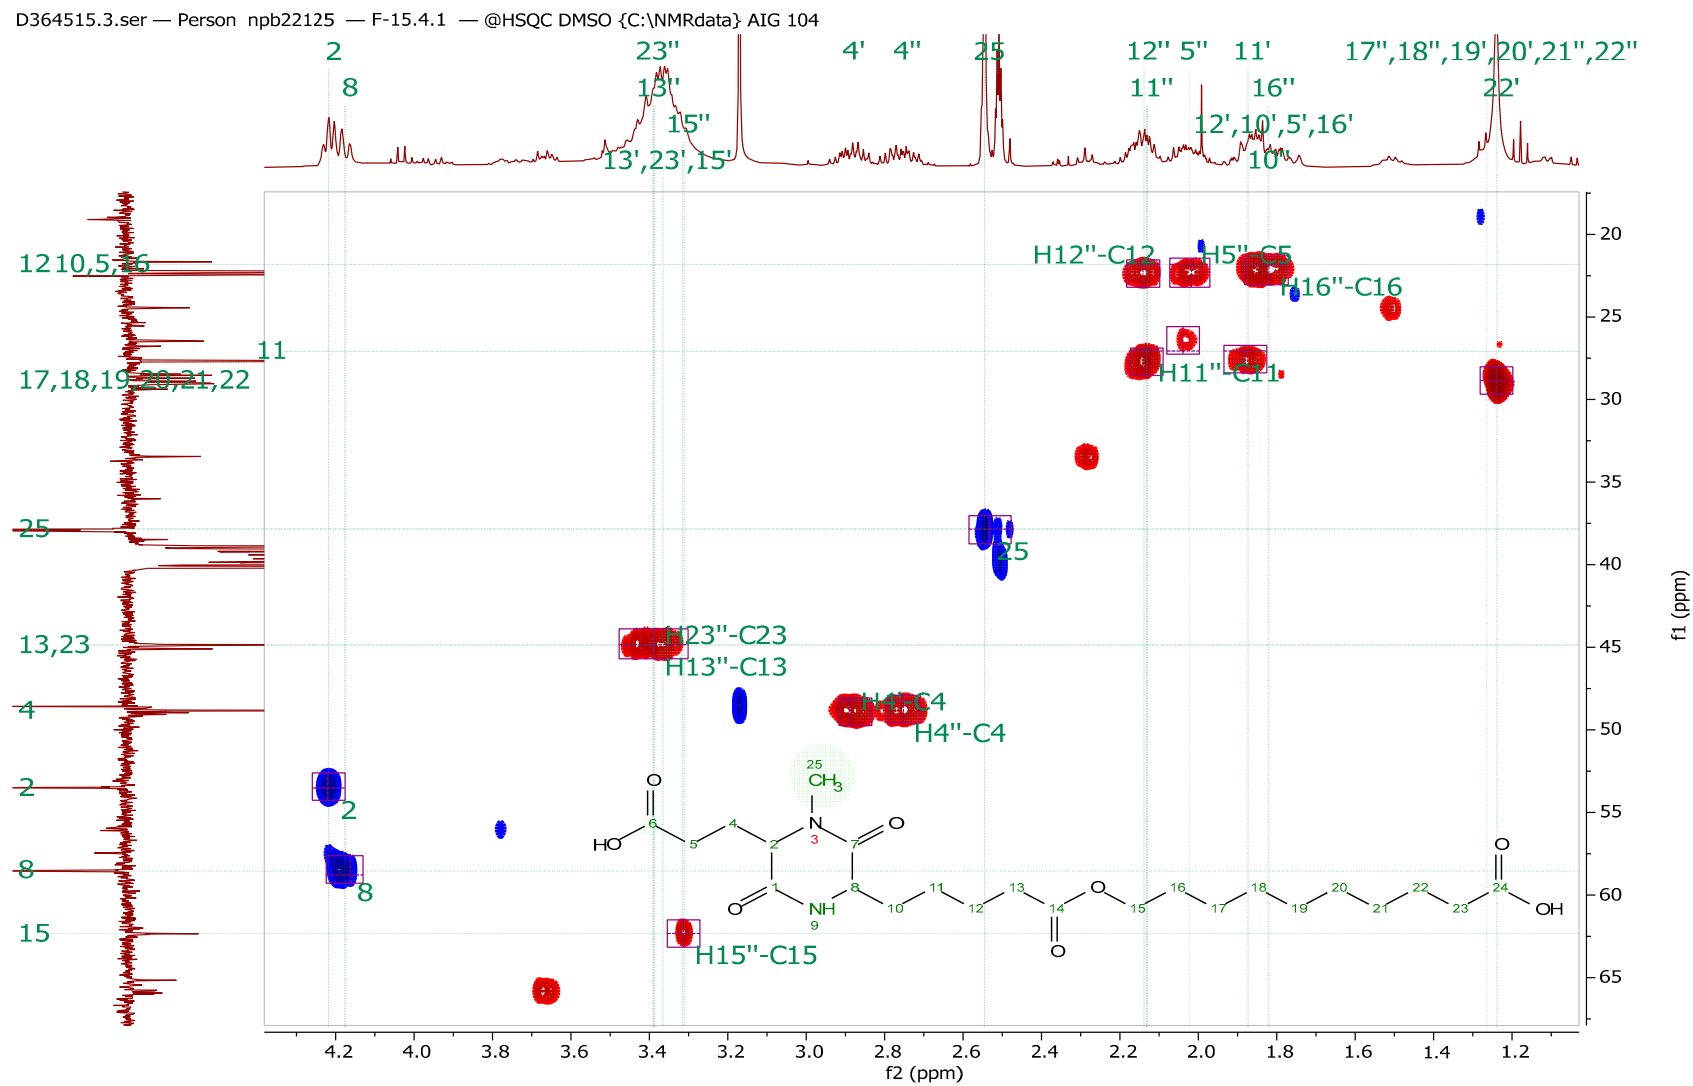

Figure S8: LC-HRMS and MS/MS fragmentation of **1**

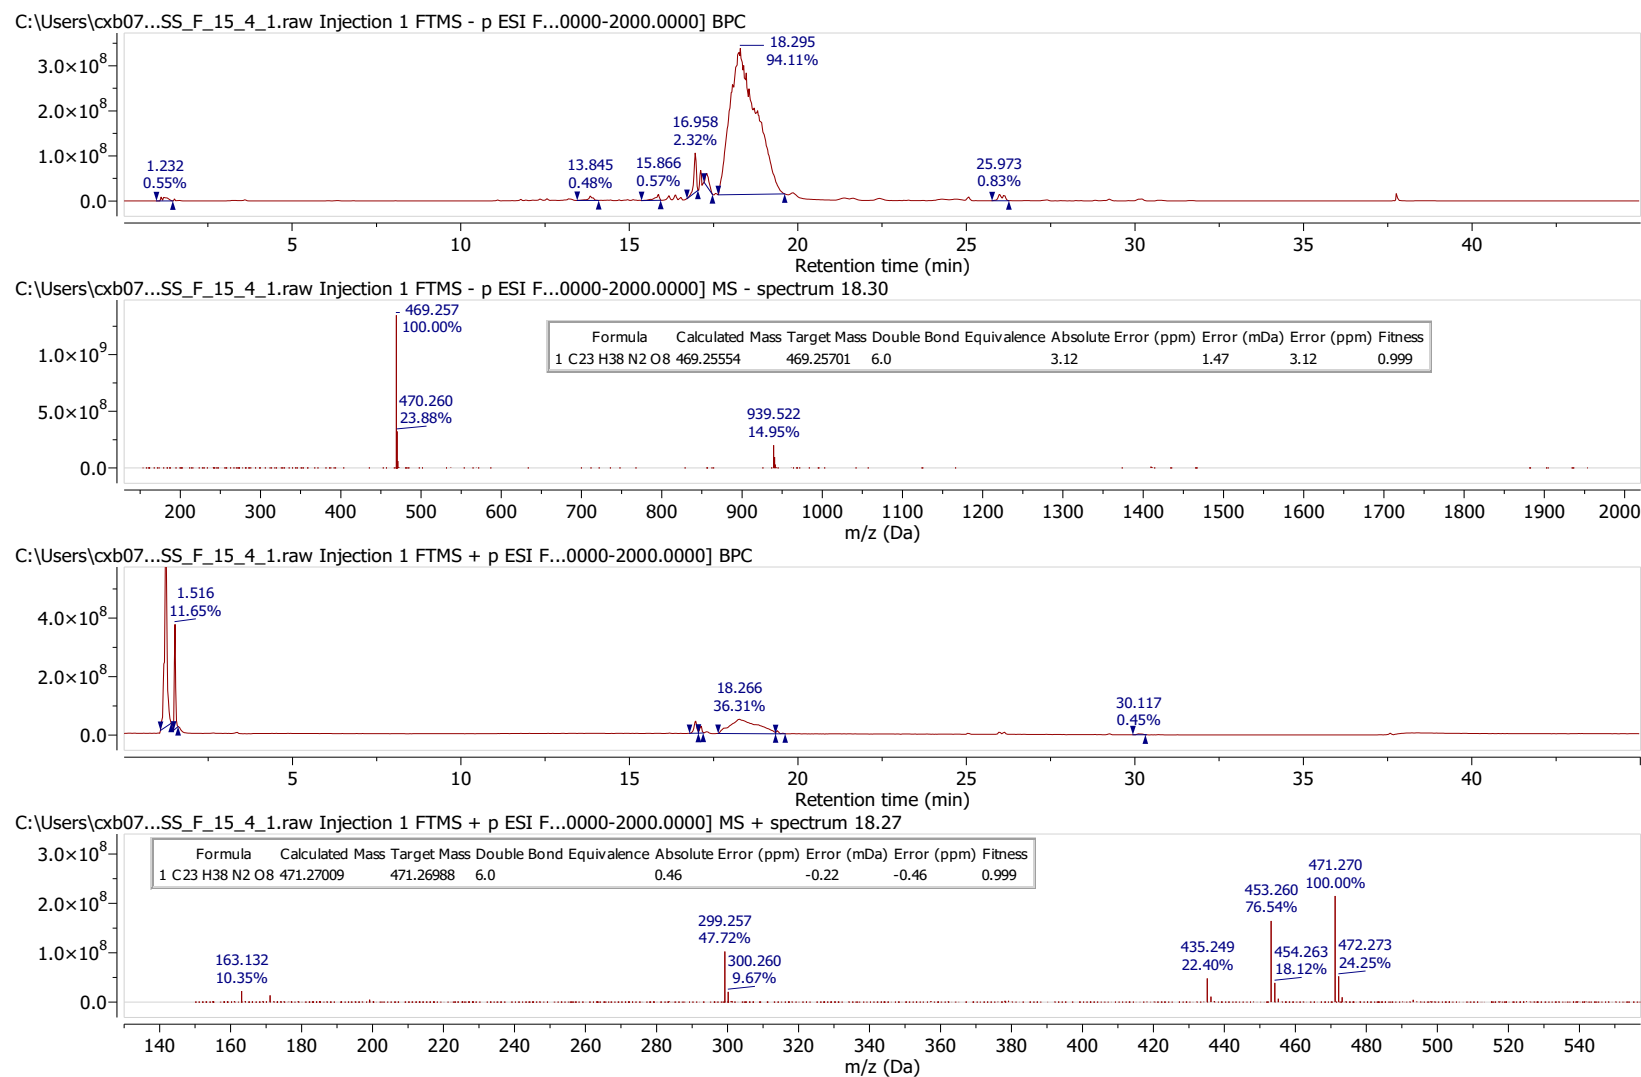

Figure S9: ECD spectrum of compound **1** in methanol.

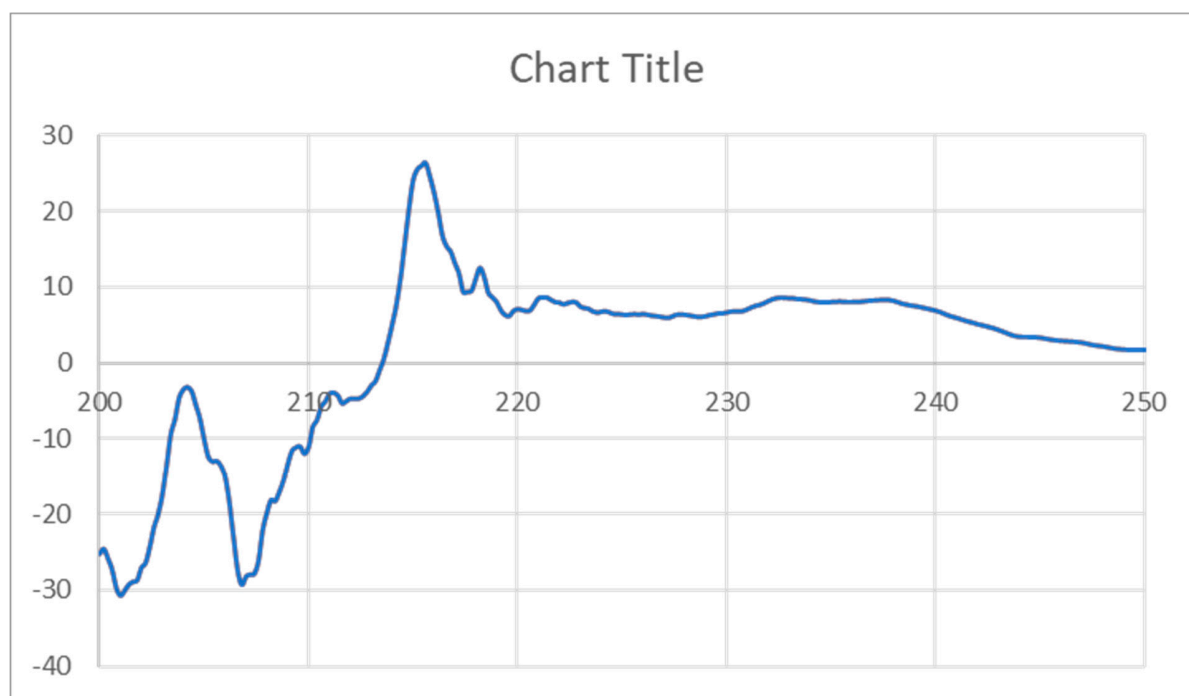

Figure S10: Post-biofilm MBEC determination of Ciprofloxacin antibiotic against *MRSA* ATCC 29213.

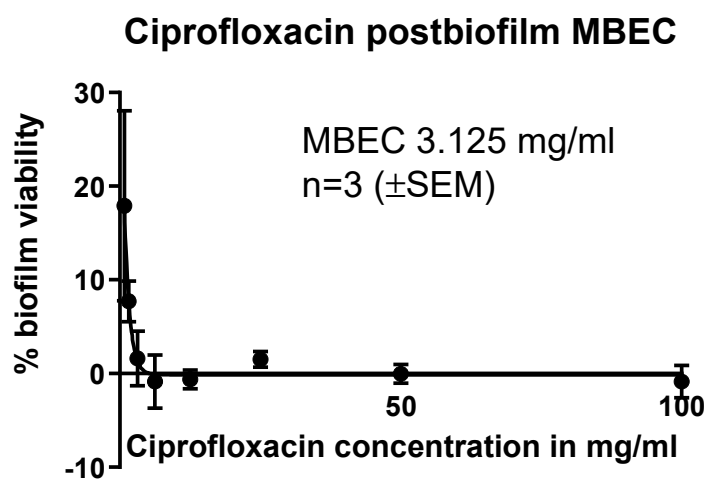

Supplement: s1 [file s1]
